# Supplementary material
Source: publisher figshare collection journal article supplement (https://gsapubs.figshare.com/articles/dataset/_/21919230)
Supplement: Supplementary file 1 [file 1]

Fournier-Roy, F., Guilmette, C., Larson, K., Godet, A., Soret, M., van Staal, C., and Bédard, J.H., 2022, Geochemistry and geochronology of the Bay of Islands, Newfoundland, Canada, metamorphic sole: Protoliths and implications for subduction initiation: GSA Bulletin, <https://doi.org/10.1130/B36662.1>.

## Supplemental Material

**Table S1.** Coordinates for geochronology specimens.

**Table S2.** Major element contents.

**Table S3.** Trace element contents.

**Table S4.** Geochemistry quality control data.

**Table S5.** Titanite U-Pb geochronology.

**Table S6.** Detrital zircon U-Pb geochronology.

**Table S7.** Zircon trace element contents.

**Figure S1.** Back-scatter electron images showing size, morphology, textures, and laser spot locations for analyzed concordant zircon grains from sample NA-19-02.

**Figure S2.** Cathodoluminescence images showing representative size, morphology, zoning, and textures of analyzed zircon grains from sample NA-19-02. Warmer colors correspond to brighter cathodoluminescence.

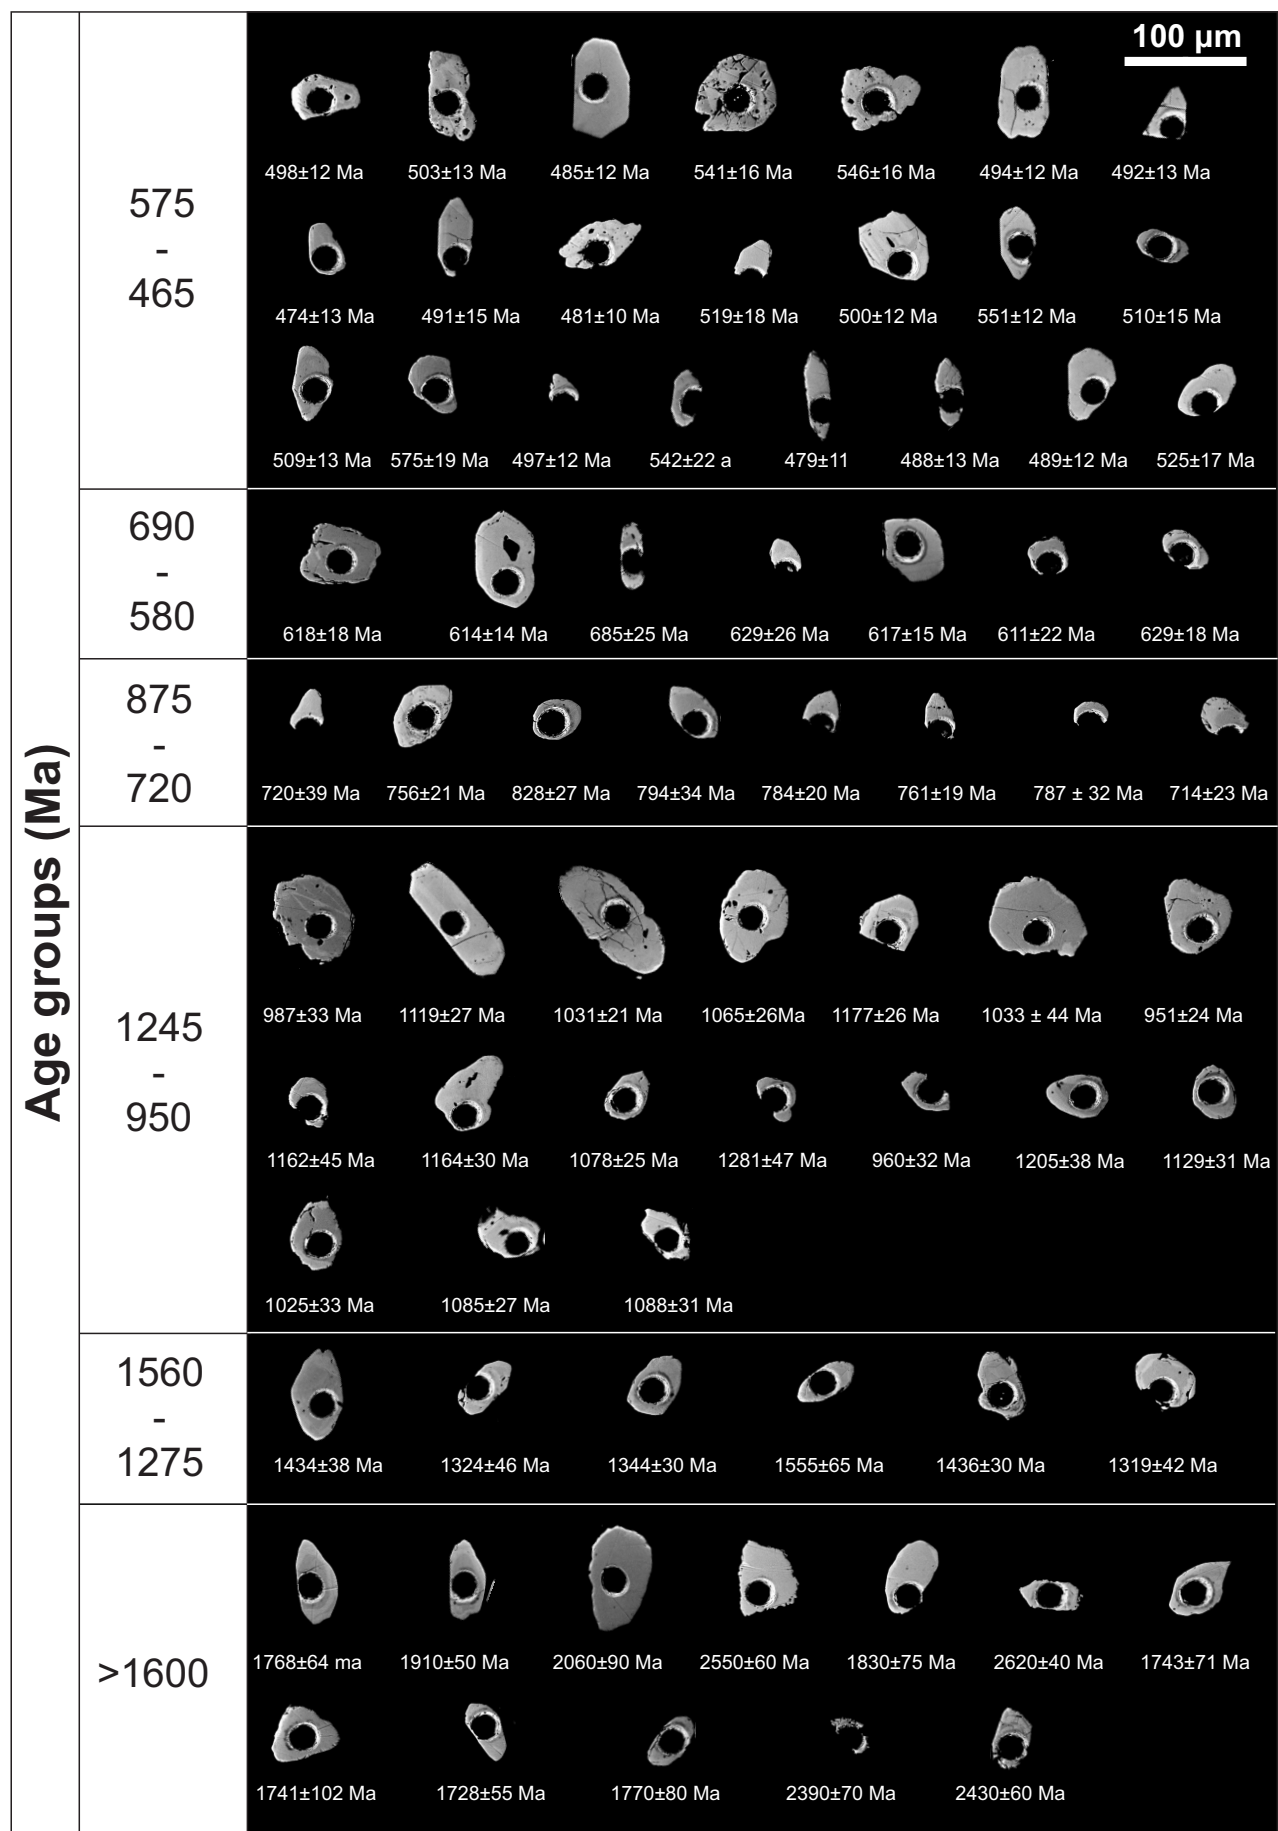

**Figure S1.** Back-scatter electron images showing size, morphology, textures, and laser spot locations for analyzed concordant zircon grains from sample NA-19-02.

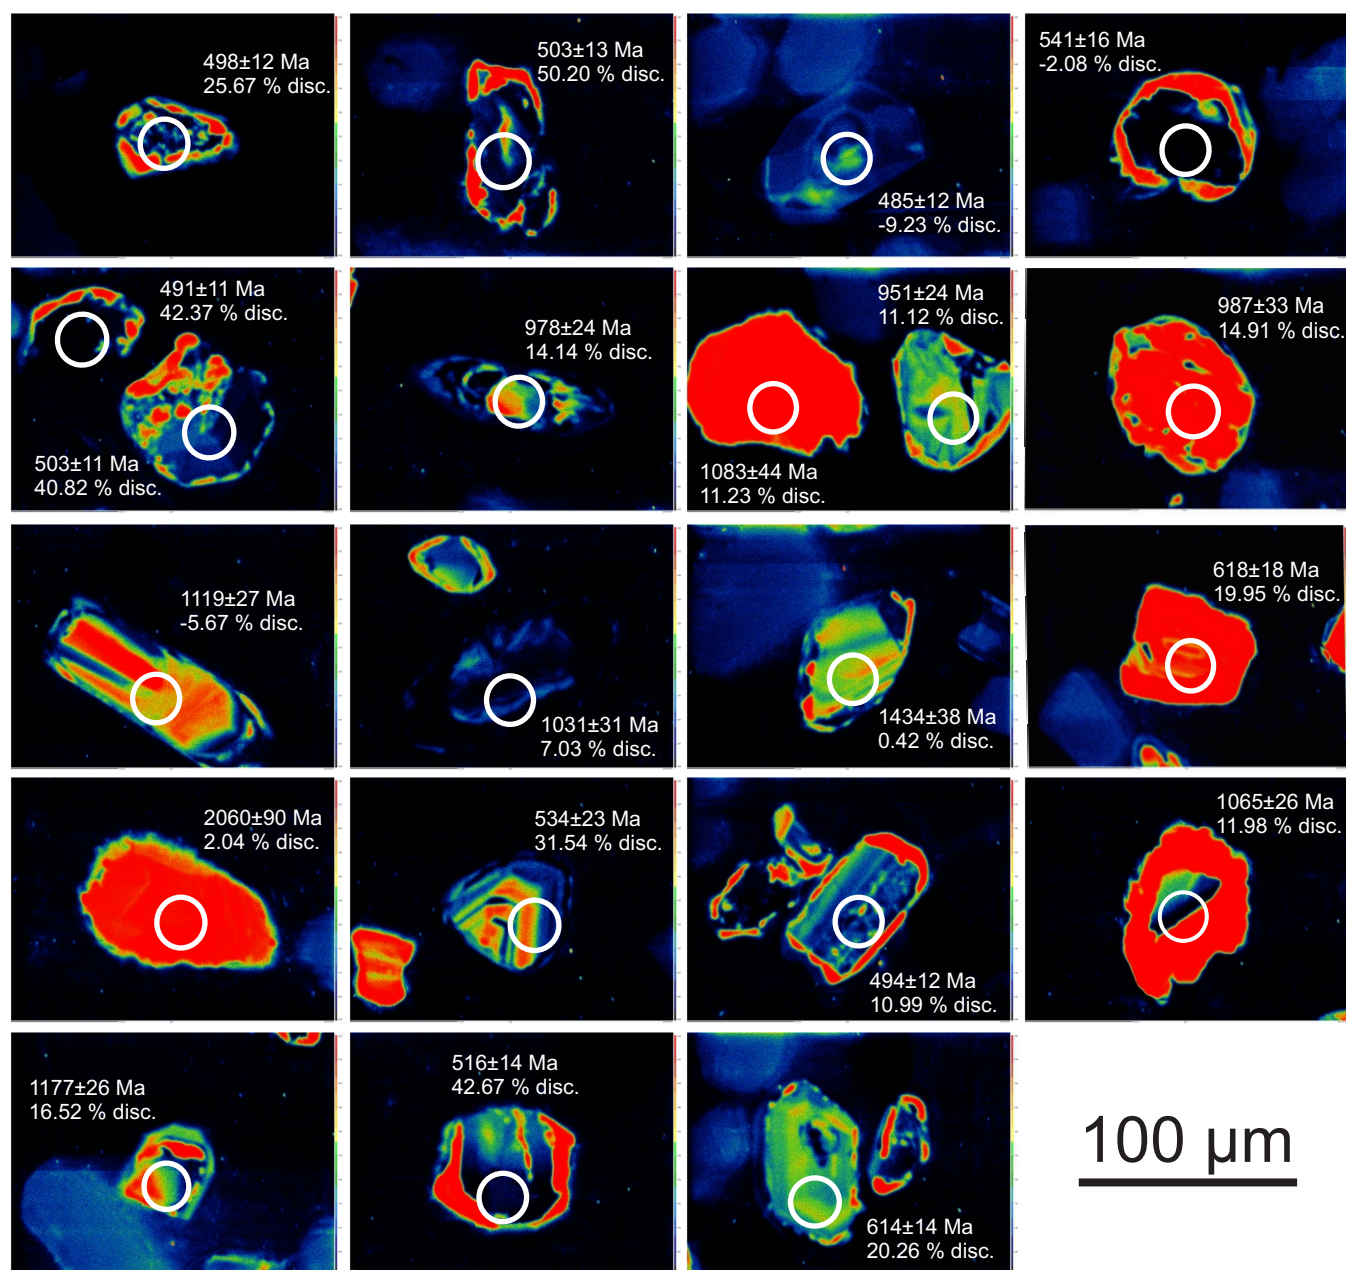

**Figure S2.** Cathodoluminescence images showing representative size, morphology, zoning, and textures of analyzed zircon grains from sample NA-19-02. Warmer colors correspond to brighter cathodoluminescence.
