# Supplementary material
Source: publisher figshare collection journal article supplement (https://gsapubs.figshare.com/articles/dataset/_/21919230)
Supplement: Supplementary file 1 [file 1]

## Sheet: Feuil1
Table S6. Detrital zircon U-Pb geochronology
NA-19-02			U-Th-Pb					Isotopic ratios										Dates (Ma)									Discordanceb
Analysis			Pb (ppm)	U (ppm)	Th (ppm)	U/Th		238U/206Pb	±2σ (%)	207Pb/206Pb	±2σ (%)	207Pb/235U	±2σ (%)	206Pb/238U	±2σ (%)	rho		207Pb/206Pb	±2σ (abs)	207Pb/235U	±2σ (abs)	206Pb/238U	±2σ (abs)	206Pb/238Ua	±2σ (abs)		(%)
1st analytical session	Z_NA1902-1		874.1	71.2	256.9	3.916		12.44	2.5	0.062	5.4	0.687	5.9	0.0804	2.5	0.42		670	110	531	24	498	12	495	12		25.6716
	Z_NA1902-2		926	153.4	472.5	2.101		12.32	2.7	0.0729	8.3	0.816	8.8	0.0812	2.7	0.31		1010	170	606	40	503	13	494	13		50.198
	Z_NA1902-3		884.4	5.5	27.6	34.988		12.79	2.7	0.0558	4.3	0.601	5	0.0782	2.7	0.53		444	95	478	19	485	12	486	13		-9.23423
	Z_NA1902-4		3766.5	1053	4398.2	1.258		11.43	3.2	0.0579	3.2	0.699	4.5	0.0875	3.2	0.71		530	70	538	19	541	16	541	16		-2.07547
	Z_NA1902-5		505.2	66.3	269.4	2		12.31	2.3	0.0674	6.9	0.755	7.3	0.0812	2.3	0.32		850	144	571	32	503	11	497	11		40.8235
	Z_NA1902-6		537.4	58.9	108.3	5.205		6.1	2.7	0.0777	3.5	1.755	4.4	0.1639	2.7	0.61		1139	70	1029	29	978	24	971	24		14.1352
	Z_NA1902-7		2288.9	40.5	23.4	104.022		11.31	3	0.062	3.4	0.755	4.6	0.0884	3	0.65		670	70	571	20	546	16	544	16		18.5075
	Z_NA1902-8		182.5	16.7	34.5	5.156		6.05	3.6	0.0786	5.2	1.79	6.4	0.1654	3.6	0.57		1160	100	1042	42	987	33	979	33		14.9138
	Z_NA1902-9		159.8	14.5	27.6	5.988		5.28	2.6	0.0747	5.1	1.95	5.8	0.1896	2.6	0.45		1059	104	1099	39	1119	27	1122	27		-5.66572
	Z_NA1902-10		1276.3	55.2	184.3	7.804		5.77	2.3	0.0766	3.3	1.83	4	0.1734	2.3	0.56		1109	66	1056	26	1031	21	1028	22		7.03336
	Z_NA1902-11		240	61.7	87.2	2.661		4.01	3	0.0905	3.9	3.11	4.9	0.2492	3	0.61		1440	70	1435	37	1434	38	1434	38		0.416667
	Z_NA1902-12		98.9	23.1	81.3	1.189		9.94	3	0.0649	9.5	0.901	9.9	0.1006	3	0.30		772	200	652	48	618	18	615	18		19.9482
	Z_NA1902-13		80.4	51.9	51.9	1.485		2.72	2.3	0.1272	4.9	6.45	5.4	0.3676	2.3	0.42		2060	90	2039	48	2018	39	2012	41		2.03883
	Z_NA1902-14		496.2	88.5	427.1	1.175		11.57	4.5	0.0652	5.8	0.777	7.4	0.0864	4.5	0.61		780	120	583	33	534	23	530	23		31.5385
	Z_NA1902-15		776	115.4	514	1.382		12.55	2.6	0.0587	4.8	0.645	5.4	0.0797	2.6	0.47		555	104	505	22	494	12	493	12		10.991
	Z_NA1902-16		769.3	101.6	202.7	3.549		5.57	2.7	0.0806	3.6	1.994	4.5	0.1796	2.7	0.60		1210	70	1114	30	1065	26	1058	26		11.9835
	Z_NA1902-17		387.5	76.5	113.4	3.274		4.99	2.4	0.0895	4.7	2.47	5.3	0.2004	2.4	0.45		1410	90	1264	38	1177	26	1163	26		16.5248
	Z_NA1902-18		977.4	148	588.3	1.671		12.01	2.8	0.069	10	0.792	11	0.0833	2.8	0.26		900	210	592	48	516	14	509	14		42.6667
	Z_NA1902-19		279.7	69.8	249.8	1.056		10.01	2.4	0.0648	5.4	0.892	5.9	0.0999	2.4	0.41		770	110	647	28	614	14	611	14		20.2597
	Z_NA1902-20		49.8	7.5	11.8	4.033		5.46	4.4	0.0811	8.9	2.04	10	0.183	4.4	0.45		1220	180	1130	68	1083	44	1076	45		11.2295
	Z_NA1902-21		70.1	5.8	20.5	3.328		10.63	3.5	0.057	11	0.74	11	0.0941	3.5	0.31		492	237	562	48	580	19	581	20		-17.8862
	Z_NA1902-22		2252.8	20.3	118.3	20.74		11.76	3.9	0.0664	3.4	0.779	5.1	0.0851	3.9	0.75		820	71	585	23	526	19	521	19		35.8537
	Z_NA1902-23		7314.9	15.3	62.1	115.29		12.6	2.7	0.0577	3.1	0.632	4.1	0.0794	2.7	0.65		520	70	497	16	492	13	492	13		5.38462
	Z_NA1902-24		578.3	89.4	179	3.18		5.06	4.3	0.0943	5.4	2.57	6.9	0.1974	4.3	0.62		1514	102	1291	50	1162	45	1141	45		23.2497
	Z_NA1902-25		499.6	51.3	57.2	8.778		10.01	3.3	0.0901	4.5	1.242	5.6	0.0999	3.3	0.59		1430	90	820	32	614	20	592	19		57.0629
	Z_NA1902-26		1335.5	202.7	518	2.549		8.92	3.9	0.0696	7.1	1.075	8.1	0.1121	3.9	0.48		920	150	741	43	685	25	679	25		25.5435
	Z_NA1902-28		150.5	12.6	61.2	2.493		13.11	2.7	0.0588	9.3	0.618	9.7	0.0763	2.7	0.28		560	200	489	37	474	13	473	13		15.3571
	Z_NA1902-29		198.5	13.9	64.3	3.596		12.64	3.3	0.0611	8.4	0.667	9	0.0791	3.3	0.36		640	180	519	37	491	15	488	16		23.2812
	Z_NA1902-30		661.1	55.6	303.2	2.629		13.87	2.9	0.0874	6.5	0.868	7.1	0.0721	2.9	0.42		1367	125	634	33	449	13	432	13		67.1544
	Z_NA1902-31		765.7	70	216.8	3.9		11.76	2.9	0.0811	3.8	0.951	4.8	0.085	2.9	0.61		1220	70	678	24	526	15	511	14		56.8852
	Z_NA1902-32		512.2	54.5	215.7	2.422		13.28	2.4	0.0644	5.3	0.669	5.8	0.0753	2.4	0.41		750	110	520	24	468	11	463	11		37.6
	Z_NA1902-33		557.2	27.4	65.5	9.396		12.54	2.8	0.0713	6.7	0.783	7.3	0.0797	2.8	0.38		960	140	587	33	495	13	486	13		48.4375
	Z_NA1902-34		583.2	117.4	411.8	5.171		11.35	3.8	0.0713	6.8	0.866	7.8	0.0881	3.8	0.49		960	140	633	37	544	20	536	20		43.3333
	Z_NA1902-35		1420.3	104.2	92	49.27		11.14	5.3	0.0899	6.1	1.113	8	0.0898	5.3	0.66		1420	120	760	43	554	28	534	27		60.9859
	Z_NA1902-36		608.3	34.6	24.6	39.62		11.45	4.8	0.085	7	1.023	8.5	0.0874	4.8	0.57		1310	140	715	44	540	25	523	25		58.7786
	Z_NA1902-37		591.5	83.3	113.6	7.486		12.27	4.7	0.1041	6.5	1.169	8	0.0815	4.7	0.59		1700	120	786	44	505	23	477	22		70.2941
	Z_NA1902-38		1133.3	166.9	512	2.482		13.7	4.4	0.1111	8.2	1.12	9.3	0.073	4.4	0.47		1816	149	762	50	454	19	424	19		75
	Z_NA1902-39		11883.1	201.7	39.6	297.876		14.92	3.9	0.0623	3	0.575	4.9	0.067	3.9	0.79		682	65	461	18	418	16	415	16		38.7097
	Z_NA1902-40		1898.9	204	913	2.222		12.91	2.1	0.0568	4.4	0.606	4.9	0.0775	2.1	0.43		480	100	481	19	481	9.9	481	10		-0.208333
	Z_NA1902-41		976.3	170.5	318.8	4.246		10.23	7.2	0.127	11	1.71	13	0.0977	7.2	0.53		2050	200	1011	86	601	41	553	39		70.6829
	Z_NA1902-42		707.3	44.9	91	8.525		11.92	3.7	0.0643	10	0.744	11	0.0839	3.7	0.34		750	220	565	47	519	18	515	19		30.8
	Z_NA1902-43		830.3	97	379.6	2.193		12.89	2.7	0.0718	7	0.768	7.5	0.0776	2.7	0.35		980	143	578	33	482	12	473	12		50.8163
	Z_NA1902-44		1051.3	23.6	61.4	19.209		12.39	2.5	0.0594	4.1	0.66	4.8	0.0807	2.5	0.52		580	90	515	19	500	12	499	12		13.7931
	Z_NA1902-45		961.7	79.5	26.4	40.7		11.8	2.8	0.0871	6.3	1.017	6.9	0.0847	2.8	0.41		1362	122	713	35	524	14	506	14		61.5272
	Z_NA1902-46		684.7	39.8	64.7	20.822		9.76	4.3	0.0682	4.6	0.964	6.3	0.1025	4.3	0.68		880	100	685	31	629	26	623	25		28.5227
	Z_NA1902-47		799.1	155.9	214.8	3.699		5.63	3.8	0.0945	6.7	2.31	7.7	0.1776	3.8	0.49		1518	128	1216	55	1054	37	1029	37		30.5665
	Z_NA1902-48		70.1	105.9	90.7	0.772		1.928	2.6	0.1688	3.5	12.07	4.3	0.519	2.6	0.59		2550	60	2610	41	2694	56	2747	59		-5.64706
	Z_NA1902-49		2805.8	85.9	45.7	52.375		12.04	5.8	0.084	19	0.96	20	0.0831	5.8	0.29		1294	374	685	98	514	28	498	29		60.2782
	Z_NA1902-50		579	23.7	62.4	9.309		8.47	5.7	0.0709	4.8	1.154	7.4	0.1181	5.7	0.77		953	98	779	40	720	39	713	38		24.4491
	Z_NA1902-51		294.8	65.2	37.3	10.623		6.57	4.3	0.1383	5.3	2.9	6.9	0.1522	4.3	0.63		2210	90	1382	52	913	37	839	35		58.6878
	Z_NA1902-52		605.2	74.5	67.9	12.039		10.47	3.3	0.1019	5.7	1.341	6.6	0.0955	3.3	0.51		1660	110	864	38	588	19	558	18		64.5783
	Z_NA1902-53		654.7	175.5	600.3	1.174		13.93	4.3	0.119	9.2	1.18	10	0.0718	4.3	0.42		1948	166	792	56	447	19	412	18		77.0534
	Z_NA1902-54		376.6	204.5	254.8	1.482		2.814	2.9	0.1119	4.1	5.48	5.1	0.355	2.9	0.58		1830	75	1898	44	1960	50	1978	51		-7.10383
	Z_NA1902-55		909.8	210.6	270.5	3.477		7.38	2.8	0.0929	3.7	1.736	4.6	0.1355	2.8	0.60		1490	70	1022	30	819	21	794	21		45.0336
	Z_NA1902-56		843.5	22.4	17.3	48.504		12.03	2.4	0.0655	6.3	0.751	6.7	0.0831	2.4	0.35		790	130	569	29	515	12	510	12		34.8101
	Z_NA1902-57		291.7	42.8	65.2	4.637		8.17	2.6	0.0818	7.4	1.38	7.9	0.1224	2.6	0.34		1241	146	881	46	744	19	729	19		40.0483
	Z_NA1902-58		228.6	340.4	291.7	0.822		1.923	2.4	0.1768	3.4	12.67	4.1	0.52	2.4	0.58		2620	40	2655	39	2699	53	2727	56		-3.01527
	Z_NA1902-59		255.5	34.5	102.9	2.433		11.66	2.7	0.0789	7.3	0.932	7.8	0.0858	2.7	0.34		1170	150	669	38	531	14	517	14		54.6154
	Z_NA1902-60		991.3	38.7	22.3	49.864		12.38	3	0.0752	7.1	0.837	7.7	0.0808	3	0.38		1073	144	618	36	501	14	490	14		53.3085
	Z_NA1902-61		1319.1	23	62.1	21.911		8.04	3	0.0721	3.7	1.236	4.7	0.1244	3	0.63		990	70	817	27	756	21	749	21		23.6364
	Z_NA1902-62		817.8	373.6	778.4	1.051		11.53	4	0.169	11	2.02	11	0.0867	4	0.35		2548	143	1122	78	536	20	464	21		78.9639
	Z_NA1902-63		286.5	130.1	188.4	1.636		4.38	3.8	0.0927	4.9	2.91	6.2	0.2281	3.8	0.62		1480	90	1385	47	1324	46	1313	46		10.5405
	Z_NA1902-64		390.5	26.3	181.7	3.657		10.88	3.5	0.0852	6.3	1.079	7.2	0.0919	3.5	0.49		1318	123	743	38	567	19	549	19		56.9803
	Z_NA1902-65		403.9	75.8	125.6	3.183		5.05	2.8	0.0865	4.4	2.36	5.2	0.1978	2.8	0.54		1348	86	1230	37	1164	30	1153	30		13.6499
	Z_NA1902-66		1061.5	106.8	87.7	12.52		7.77	2.9	0.0918	3.9	1.629	4.9	0.1287	2.9	0.61		1463	74	981	31	781	22	756	21		46.6165
	Z_NA1902-67		591.3	322.5	453.4	1.322		3.504	2.5	0.1067	3.9	4.2	4.6	0.2854	2.5	0.53		1743	71	1673	38	1619	35	1606	36		7.11417
	Z_NA1902-68		353.2	97.5	184.4	1.998		5.5	2.5	0.0749	4.2	1.879	4.9	0.182	2.5	0.51		1070	80	1074	32	1078	25	1078	25		-0.747664
	Z_NA1902-69		78.5	52.2	63.7	1.237		3.509	2.5	0.1066	5.5	4.19	6.1	0.285	2.5	0.41		1741	102	1671	50	1617	35	1604	36		7.12234
	Z_NA1902-70		401.4	128.2	281.2	1.541		6.29	2.7	0.0751	4.3	1.646	5.1	0.159	2.7	0.53		1070	90	988	32	951	24	946	24		11.1215
	Z_NA1902-71		139.9	15.2	41.2	3.541		12.77	3.6	0.083	12	0.89	13	0.0783	3.6	0.28		1261	245	648	62	486	17	471	17		61.4592
	Z_NA1902-72		2615.3	12.2	36.6	71.592		12.13	2.4	0.0593	3.4	0.673	4.2	0.0824	2.4	0.58		576	74	523	17	511	12	510	12		11.2847
	Z_NA1902-73		434.1	252.5	314	1.363		3.546	2.2	0.1058	3	4.11	3.7	0.282	2.2	0.59		1728	55	1657	30	1601	31	1589	32		7.34954
	Z_NA1902-75		973.4	92.6	336.8	2.878		13.13	2.4	0.0702	4.8	0.737	5.4	0.0762	2.4	0.44		932	99	560	23	473	11	465	11		49.2489
	Z_NA1902-76		477.7	219.4	309.3	1.517		3.85	3.1	0.1082	4.4	3.87	5.4	0.2596	3.1	0.58		1770	80	1607	43	1488	42	1462	42		15.9322
	Z_NA1902-77		152.1	17.7	48.8	3.099		15.09	5.6	0.0974	8.5	0.889	10	0.0663	5.6	0.55		1573	160	646	49	414	23	392	22		73.6809
	Z_NA1902-78		4865.3	1632.1	2091.3	2.479		2.81	4.3	0.1539	4.1	7.55	6	0.356	4.3	0.73		2390	70	2179	53	1962	73	1888	72		17.9079
	Z_NA1902-79		829.4	39.6	159.5	6.684		12.14	3	0.0633	5.3	0.718	6.1	0.0824	3	0.49		720	110	550	26	510	15	507	15		29.1667
	Z_NA1902-80		912.4	120.5	199.1	4.464		4.55	4	0.1121	6	3.4	7.2	0.2198	4	0.56		1833	108	1504	56	1281	47	1239	46		30.1146
	Z_NA1902-81		1383.6	204.8	763.6	1.761		9.95	2.5	0.0633	4	0.876	4.7	0.1005	2.5	0.52				639	23	617	15	615	15
	Z_NA1902-82		1559.2	1642.5	1015.6	1.519		6.37	3.8	0.298	11	6.45	12	0.1571	3.8	0.31		2640	0	2040	110	941	33	684	45		64.3561
	Z_NA1902-83		728	58.2	179.8	4.146		11.81	4.1	0.0851	5.9	0.994	7.2	0.0847	4.1	0.58		1318	114	701	36	524	21	507	20		60.2428
	Z_NA1902-84		427.7	232.3	387.3	1.107		4.31	2.5	0.0959	3.3	3.06	4.2	0.2318	2.5	0.60		1544	62	1423	32	1344	30	1329	31		12.9534
	Z_NA1902-85		364.4	40.3	59.2	6.132		6.23	3.6	0.0829	4.5	1.83	5.7	0.1605	3.6	0.63		1270	90	1058	38	960	32	947	32		24.4094
	Z_NA1902-86		120.9	29	49.5	2.43		4.86	3.5	0.0884	6.4	2.5	7.3	0.2056	3.5	0.48		1390	123	1273	53	1205	38	1194	39		13.3094
	Z_NA1902-87		1149.3	75.5	218.5	9.953		11.63	2.6	0.0692	4	0.819	4.8	0.086	2.6	0.54		900	80	608	22	532	13	525	13		40.8889
	Z_NA1902-88		357.2	23.2	12.1	28.908		11.81	3.5	0.0847	11	0.99	11	0.0847	3.5	0.32		1308	205	698	56	524	18	507	18		59.9388
	Z_NA1902-89		644.5	52.8	21.3	31.736		12.39	2.9	0.0973	5.2	1.083	6	0.0807	2.9	0.48		1570	100	745	31	500	14	476	14		68.1529
	Z_NA1902-90		355.4	45.8	128.9	4.695		11.6	6.7	0.095	21	1.13	22	0.0862	6.7	0.30		1530	410	770	120	533	34	509	35		65.1634
	Z_NA1902-91		388.4	176.6	486	0.818		7.3	3.5	0.07	5.5	1.322	6.5	0.137	3.5	0.54		930	110	855	38	828	27	825	27		10.9677
	Z_NA1902-92		47.1	16.6	29.6	1.606		5.22	3	0.0861	8.3	2.27	8.8	0.1915	3	0.34		1340	161	1204	62	1129	31	1118	32		15.7463
	Z_NA1902-93		1244.7	298.9	1104.1	1.15		10.88	2.9	0.0572	4	0.724	4.9	0.0919	2.9	0.59		500	90	553	21	567	16	568	16		-13.4
	Z_NA1902-94		385.8	50.1	206.2	1.941		12.16	2.7	0.0588	5.6	0.666	6.2	0.0822	2.7	0.43		560	120	518	25	509	13	509	13		9.10714
	Z_NA1902-95		442.4	122.2	407.3	1.393		10.72	3.4	0.0597	6.1	0.768	6.9	0.0933	3.4	0.49		592	132	578	31	575	19	575	19		2.87162
	Z_NA1902-96		1442.9	19.4	39.7	41.511		12.49	2.5	0.0571	3.9	0.631	4.6	0.0801	2.5	0.55		500	80	496	18	497	12	497	12		0.6
	Z_NA1902-97		1133.7	33.2	59.3	20.905		11.41	4.1	0.0614	5.1	0.741	6.6	0.0876	4.1	0.63		650	110	563	28	542	22	540	22		16.6154
	Z_NA1902-99		852.9	157	608.8	2.473		12.66	3	0.0664	7	0.723	7.6	0.079	3	0.39		820	150	552	32	490	14	485	14		40.2439
	Z_NA1902-100		55.8	16.1	51.1	1.097		10.64	3.8	0.0685	14	0.89	15	0.094	3.8	0.26		883	296	645	70	579	21	573	22		34.4281
	Z_NA1902-101		1428.7	248.6	611.3	2.964		8.48	2.8	0.0803	3.4	1.305	4.3	0.1179	2.8	0.63		1203	66	848	25	719	19	704	19		40.2328
	Z_NA1902-102		6626.7	33.5	66.2	98.984		12.98	2.5	0.056	3.8	0.594	4.5	0.0771	2.5	0.55		450	80	474	17	479	11	479	11		-6.44444
	Z_NA1902-103		338.9	30.4	32.7	10.232		10.39	3.3	0.0702	6.3	0.931	7.1	0.0963	3.3	0.46		930	130	668	35	592	19	585	19		36.3441
	Z_NA1902-104		483.9	58	247.9	1.971		12.72	2.9	0.0582	6.2	0.631	6.8	0.0786	2.9	0.42		538	135	497	27	488	13	487	14		9.29368
	Z_NA1902-105		389.8	160	218.4	1.864		3.73	3.2	0.0964	3.5	3.56	4.7	0.2682	3.2	0.68		1555	65	1541	37	1531	44	1529	44		1.54341
	Z_NA1902-106		430.2	117.1	178.9	2.412		4.008	2.3	0.0897	3.7	3.09	4.4	0.2495	2.3	0.53		1420	70	1429	33	1436	30	1437	30		-1.12676
	Z_NA1902-107		971.1	45.5	79.8	15.096		11.63	3.6	0.0665	6.3	0.789	7.3	0.086	3.6	0.49		822	132	590	33	532	18	526	18		35.2798
	Z_NA1902-108		1386.1	89.3	159.2	9.559		8.12	3.7	0.0799	3.2	1.357	4.9	0.1232	3.7	0.76		1190	60	870	28	749	26	735	26		37.0588
	Z_NA1902-109		1196.1	283.2	1071.8	1.491		11.71	3.1	0.0821	8.3	0.967	8.9	0.0854	3.1	0.35		1247	164	687	44	528	16	513	16		57.6584
	Z_NA1902-110		611.4	56.5	105	6.293		5.81	4.1	0.0932	4	2.21	5.7	0.1721	4.1	0.72		1490	76	1184	40	1024	39	1000	38		31.2752
	Z_NA1902-111		1152.2	91.2	135.9	8.839		3.55	2.3	0.1172	2.9	4.55	3.7	0.2817	2.3	0.63		1910	50	1740	31	1600	33	1567	33		16.2304
	Z_NA1902-112		646.1	7.3	14.1	50.664		12.4	3.6	0.0643	8.3	0.715	9	0.0807	3.6	0.40		751	175	548	38	500	17	496	17		33.4221
	Z_NA1902-113		241.6	41.1	124.7	1.999		5.81	3.5	0.0788	4.9	1.87	6.1	0.1723	3.5	0.58		1170	100	1071	40	1025	33	1018	33		12.3932
	Z_NA1902-114		580.7	50.3	195.4	3.152		12.45	2.5	0.0691	5.8	0.765	6.4	0.0803	2.5	0.40		900	120	577	28	498	12	491	12		44.6667
	Z_NA1902-115		250.9	27.4	47.5	6.1		12.24	3.5	0.1008	7.3	1.135	8.1	0.0817	3.5	0.43		1640	140	770	44	506	17	480	17		69.1463
	Z_NA1902-117		362.1	51.7	210.8	1.788		10.07	3.8	0.0659	5	0.902	6.3	0.0994	3.8	0.60		801	105	653	30	611	22	607	22		23.7203
	Z_NA1902-118		375.1	338.5	526.4	0.738		3.75	2.9	0.1082	3.5	3.98	4.5	0.2669	2.9	0.64		1768	64	1630	37	1525	39	1502	39		13.7443
	Z_NA1902-119		1721.2	293	1400.1	1.342		12.64	2.3	0.0675	4.1	0.736	4.7	0.0791	2.3	0.50		852	85	560	20	491	11	484	11		42.3709
	Z_NA1902-120		1321.5	165.4	366.2	3.766		7.66	4.6	0.079	3.7	1.422	5.9	0.1306	4.6	0.78		1170	70	898	35	791	35	779	34		32.3932
	Z_NA1902-121		2273.2	131.9	115.1	18.791		12.49	3.3	0.101	12	1.11	12	0.0801	3.3	0.27		1640	219	760	65	497	16	470	17		69.6951
	Z_NA1902-122		1357.3	60.1	178.1	8.489		9.63	4.1	0.079	5	1.131	6.5	0.1039	4.1	0.64		1170	100	768	35	637	25	623	25		45.5556
	Z_NA1902-123		564.3	103.9	454.9	1.193		13.21	2.4	0.0736	5.2	0.768	5.8	0.0757	2.4	0.42		1030	110	578	25	471	11	461	11		54.2718
	Z_NA1902-124		556.4	64.3	267.5	2.188		12.72	2.4	0.0687	5.6	0.745	6.1	0.0786	2.4	0.39		890	120	565	27	488	11	481	11		45.1685
	Z_NA1902-125		322.2	53.5	202.6	1.541		11.05	2.6	0.0624	5.6	0.777	6.2	0.0905	2.6	0.42		685	120	584	28	558	14	556	14		18.5401
	Z_NA1902-126		1389.2	51.3	37.2	47.093		9.19	5.2	0.0871	5	1.307	7.2	0.1088	5.2	0.72		1362	96	849	41	666	33	646	32		51.1013
	Z_NA1902-127		751.7	38.9	72.1	10.348		7.62	4.6	0.0713	4.2	1.288	6.2	0.1312	4.6	0.74		964	86	840	36	794	34	789	34		17.6349
	Z_NA1902-128		549.6	32.3	52.5	10.901		10.02	7.3	0.0842	4.8	1.16	8.8	0.0998	7.3	0.84		1300	90	781	48	613	43	595	42		52.8462
	Z_NA1902-129		1099.7	216	694.4	1.58		9.76	3.1	0.0629	4.7	0.888	5.7	0.1025	3.1	0.54		700	100	645	27	629	18	627	18		10.1429
	Z_NA1902-130		490.2	25.3	38.8	18.996		11.04	8.6	0.0741	8.1	0.92	12	0.0906	8.6	0.73		1043	163	665	57	559	46	549	45		46.4046
	Z_NA1902-131		1554.3	25.4	24.3	66.066		10.61	4.7	0.0664	4.5	0.862	6.5	0.0943	4.7	0.72		817	95	631	31	581	26	576	26		28.8862
	Z_NA1902-132		211.5	32.7	59.8	3.811		6.03	3	0.072	4.6	1.647	5.5	0.1659	3	0.55		990	90	988	35	989	28	990	28		0.10101
	Z_NA1902-133		2053.8	288.2	1032.4	2.84		11.2	2.9	0.0678	5.3	0.835	6.1	0.0893	2.9	0.48		861	110	616	28	552	15	545	16		35.8885
	Z_NA1902-134		1211.8	125.2	365.9	3.229		8.63	3.2	0.059	3.9	0.941	5	0.1158	3.2	0.63		560	90	674	25	707	21	710	21		-26.25
	Z_NA1902-135		230.6	27.9	125.6	2.075		12.34	2.5	0.0591	6.7	0.66	7.1	0.081	2.5	0.35		570	150	515	29	502	12	501	12		11.9298
	Z_NA1902-136		879	37.9	59.5	16.043		11.43	3.9	0.0818	8.8	0.986	9.6	0.0875	3.9	0.41		1240	172	697	48	541	20	525	20		56.371
	Z_NA1902-137		1070.9	72.6	184.3	5.988		7.73	2.6	0.0679	3.4	1.21	4.3	0.1294	2.6	0.62		864	70	805	24	784	20	782	20		9.25926
	Z_NA1902-138		1662.7	2484.2	2441.4	0.695		2.333	3.4	0.1574	3.7	9.29	5	0.429	3.4	0.67		2430	60	2368	46	2299	65	2269	65		5.39095
	Z_NA1902-139		246.4	24.1	76.3	3.329		11.72	3.2	0.0699	5.7	0.822	6.5	0.0853	3.2	0.48		924	118	609	30	528	16	520	16		42.8571
	Z_NA1902-140		1517	52.9	66.4	23.4		7.98	2.7	0.08	3.8	1.38	4.7	0.1252	2.7	0.57		1200	80	881	28	761	19	747	19		36.5833
	Z_NA1902-141		234.3	25.3	50	4.905		7.7	4.3	0.0801	5.5	1.43	7	0.1298	4.3	0.62		1200	110	903	42	787	32	773	32		34.4167
	Z_NA1902-142		764.5	62.8	253.6	5.492		12.36	2.4	0.067	5.2	0.746	5.8	0.0809	2.4	0.41		836	110	566	25	501	11	496	11		40.0718
	Z_NA1902-143		5308.2	319	667.6	9.211		8.54	3.3	0.0742	4.7	1.197	5.8	0.1171	3.3	0.58		1045	95	799	32	714	23	705	22		31.6746
	Z_NA1902-144		2027.6	81.8	195.7	13.725		12.24	3	0.0711	4.1	0.801	5.1	0.0817	3	0.60		960	80	597	23	506	15	498	15		47.2917
	Z_NA1902-145		1407.2	149.4	467.9	2.619		12.68	2.5	0.0591	5.3	0.643	5.8	0.0788	2.5	0.43		571	114	504	23	489	12	488	12		14.3608
	Z_NA1902-146		739.5	267.4	224.9	2.565		4.4	3.5	0.0929	5.2	2.91	6.3	0.2271	3.5	0.56		1484	99	1384	48	1319	42	1308	42		11.1186
	Z_NA1902-147		3475.9	1434.2	1279.7	1.817		6.82	4.1	0.1119	5.1	2.26	6.5	0.1467	4.1	0.63		1830	92	1201	46	883	34	838	33		51.7486
	Z_NA1902-148		10168.7	1303.2	1163.9	4.026		11.8	3.3	0.0635	4.1	0.742	5.3	0.0848	3.3	0.63		720	90	563	23	525	17	521	17		27.0833
	Z_NA1902-149		25561.1	-2233.1	623.1	13.888		10.95	3.6	0.071	4.9	0.894	6.1	0.0913	3.6	0.59		956	101	648	29	563	19	555	19		41.1088
	Z_NA1902-150		108251	-1878	1692.1	2.056		5.46	2.7	0.0762	4.4	1.925	5.2	0.1833	2.7	0.53		1099	88	1090	34	1085	27	1084	28		1.27389
	Z_NA1902-151		29594.4	-906.4	798	1.658		5.44	3.1	0.0826	4.9	2.09	5.8	0.1838	3.1	0.53		1260	100	1146	40	1088	31	1079	31		13.6508
	Z_NA1902-152		11275.9	-4975.8	1899	2.175		11.84	3.9	0.093	17	1.09	17	0.0844	3.9	0.23		1500	320	747	90	523	20	500	21		65.1333
	Z_NA1902-153		1612.9	214.9	60.7	19.539		9.89	4.2	0.0807	7.8	1.124	8.9	0.1011	4.2	0.47		1210	150	765	48	621	25	606	25		48.6777
2nd analytical session	Z_NA-19-02_2-1		430.9	64.6	111.3	3.866		5.15	2.4	0.0981	3.7	2.63	4.5	0.1943	2.4	0.55		1588	70	1308	33	1144	26	1118	26		27.9597
	Z_NA-19-02_2-3		884.1	202	357.6	2.545		6.02	2.6	0.0987	3.6	2.26	4.4	0.1662	2.6	0.58		1598	67	1200	31	991	24	961	23		37.985
	Z_NA-19-02_2-4		1812	82.8	134.5	14.302		12.42	3.3	0.0669	4.9	0.743	5.9	0.0805	3.3	0.55		840	100	564	26	499	16	494	16		40.5952
	Z_NA-19-02_2-5		1122.4	234.5	851.8	1.376		10.31	2.2	0.0634	4.8	0.847	5.3	0.097	2.2	0.41		720	100	623	25	597	12	594	13		17.0833
	Z_NA-19-02_2-6		543.1	46.6	207.9	2.641		12.52	2	0.0647	4.3	0.712	4.8	0.0799	2	0.42		762	92	546	20	495.5	9.5	491	9.6		34.9738
	Z_NA-19-02_2-7		115.8	22.3	25.2	4.565		3.176	2.1	0.1185	5	5.14	5.4	0.3149	2.1	0.38		1933	89	1843	46	1765	32	1744	33		8.69115
	Z_NA-19-02_2-8		274.4	42.2	144.6	2.251		9.4	3.1	0.0651	5.3	0.955	6.2	0.1064	3.1	0.51		780	110	680	31	652	19	649	19		16.4103
	Z_NA-19-02_2-9		380.5	31.3	138.3	2.749		13.09	1.7	0.0608	5	0.64	5.3	0.0764	1.7	0.31		630	110	503	21	474.7	7.6	472.3	7.8		24.6508
	Z_NA-19-02_2-10		1221	102.6	195.4	6.329		8.04	2.3	0.0817	4	1.401	4.6	0.1245	2.3	0.49		1236	79	889	27	756	16	741	16		38.835
	Z_NA-19-02_2-11		1619.3	120	308.1	5.976		12.75	2.1	0.0699	5.5	0.756	5.8	0.0784	2.1	0.36		930	110	572	26	486.7	9.9	479.1	10		47.6667
	Z_NA-19-02_2-12		216.8	84	143	1.445		4.43	1.7	0.0868	4.7	2.7	5	0.2257	1.7	0.34		1355	91	1328	37	1312	20	1309	21		3.17343
	Z_NA-19-02_2-13		790.8	100.6	388.8	2.343		12.7	2.2	0.0717	8.2	0.778	8.5	0.0787	2.2	0.25		980	170	584	38	488	10	480	11		50.2041
	Z_NA-19-02_2-14		950.2	211.5	930.6	1.118		12.65	2.7	0.0708	5.5	0.771	6.2	0.079	2.7	0.45		950	110	580	27	490	13	482	13		48.4211
	Z_NA-19-02_2-15		3632.7	115.5	92.4	39.885		12.28	1.5	0.0807	7.2	0.905	7.3	0.0814	1.5	0.20		1210	140	655	35	504.7	7.3	490.5	7.9		58.2893
	Z_NA-19-02_2-16		185	81.9	154	1.252		4.71	2.3	0.0887	4.7	2.6	5.3	0.2124	2.3	0.44		1397	91	1300	39	1241	26	1232	26		11.1668
	Z_NA-19-02_2-18		241.9	17.6	66.2	3.601		12.71	2.2	0.0644	6.3	0.699	6.6	0.0787	2.2	0.33		760	130	538	28	488	10	484	10		35.7895
	Z_NA-19-02_2-19		358.8	339.3	429.4	0.893		3.373	1.9	0.1023	3.7	4.18	4.2	0.2965	1.9	0.46		1665	68	1670	34	1674	28	1675	29		-0.540541
	Z_NA-19-02_2-20		3077	88.1	142.3	20.941		11.28	3.1	0.0702	4.1	0.858	5.1	0.0887	3.1	0.61		933	83	629	24	548	16	540	16		41.2647
	Z_NA-19-02_2-21		384.2	86.4	159.3	2.373		5.373	1.4	0.0799	4	2.049	4.2	0.1861	1.4	0.33		1193	79	1132	29	1100	14	1096	14		7.79547
	Z_NA-19-02_2-22		1555.7	871.3	1190.7	1.308		3.831	2.5	0.1032	3.2	3.71	4.1	0.261	2.5	0.61		1682	59	1574	32	1495	33	1478	33		11.1177
	Z_NA-19-02_2-23		2013.4	9.2	40.2	57.161		12.5	1.4	0.0562	3.6	0.619	3.9	0.08	1.4	0.36		459	81	490	15	496.1	6.6	496.6	6.7		-8.08279
	Z_NA-19-02_2-24		863.4	68.6	107.9	9.791		5.21	2.9	0.0819	4.1	2.17	5.1	0.1921	2.9	0.58		1242	81	1171	35	1133	30	1127	31		8.77617
	Z_NA-19-02_2-25		335.9	158.5	513.9	0.644		9.15	2.7	0.0653	5.4	0.983	6	0.1093	2.7	0.45		780	110	695	30	669	17	666	17		14.2308
	Z_NA-19-02_2-26		598.6	139.9	363.4	1.765		11.97	4.8	0.134	18	1.54	19	0.0836	4.8	0.26		2150	320	950	110	517	24	470	26		75.9535
	Z_NA-19-02_2-27		201.5	70.4	80.4	2.505		4.047	1.9	0.1214	4.6	4.14	5	0.2471	1.9	0.37		1977	82	1661	41	1424	24	1373	25		27.9717
	Z_NA-19-02_2-28		1237.8	113.9	289.3	5.115		8.25	3.9	0.0708	4.9	1.183	6.3	0.1212	3.9	0.62		950	100	793	34	737	27	731	27		22.4211
	Z_NA-19-02_2-29		609.9	188.5	587.9	1.044		7.56	2.3	0.0955	4	1.742	4.6	0.1323	2.3	0.49		1537	75	1024	30	801	17	773	17		47.8855
	Z_NA-19-02_2-30		112.8	33.3	61.1	1.856		5.313	1.7	0.0763	5.4	1.98	5.7	0.1882	1.7	0.30		1100	110	1109	38	1112	17	1112	18		-1.09091
	Z_NA-19-02_2-31		426.9	90	325.8	1.383		11.77	2	0.0797	6.1	0.933	6.4	0.085	2	0.31		1190	120	669	31	525.8	9.9	512	10		55.8151
	Z_NA-19-02_2-32		565	49.4	85.1	8.723		10.86	2.5	0.0747	5.5	0.948	6	0.0921	2.5	0.41		1060	110	677	30	568	14	557	14		46.4151
	Z_NA-19-02_2-33		416.6	55.6	73	6.348		7.87	3.2	0.0868	6.3	1.52	7	0.127	3.2	0.45		1350	120	938	43	771	23	751	23		42.8889
	Z_NA-19-02_2-34		591.2	35.9	55.9	10.652		11.78	1.8	0.0765	5.2	0.895	5.5	0.0849	1.8	0.34		1110	100	649	26	525.1	9.3	513.4	9.4		52.6937
	Z_NA-19-02_2-35		233.5	38	103.1	2.519		10.28	2.6	0.066	5.5	0.885	6.1	0.0973	2.6	0.43		810	120	644	29	599	15	594	15		26.0494
	Z_NA-19-02_2-36		796.4	68.6	203.7	10.258		11.76	2.7	0.0682	5.7	0.8	6.3	0.085	2.7	0.42		880	120	597	28	526	13	519	14		40.2273
	Z_NA-19-02_2-37		744.4	100.3	373	3.297		12.32	3.2	0.0937	8	1.049	8.6	0.0812	3.2	0.37		1500	150	728	45	503	15	481	15		66.4667
	Z_NA-19-02_2-38		795	152.8	396	1.865		8.81	4	0.1082	6.9	1.69	8	0.1135	4	0.50		1770	130	1006	51	693	26	656	25		60.8475
	Z_NA-19-02_2-39		2046.2	543.1	1838.8	1.208		12.87	1.9	0.0883	5.6	0.946	5.9	0.0777	1.9	0.32		1390	110	676	29	482.5	8.9	464.2	9		65.2878
	Z_NA-19-02_2-40		795.2	107.6	420	3.383		13.27	2.1	0.0745	4.4	0.774	4.9	0.0754	2.1	0.43		1055	89	582	22	468.4	9.4	458.2	9.4		55.6019
	Z_NA-19-02_2-41		458.2	38.9	151.7	3.151		12.75	2.5	0.085	6.6	0.919	7.1	0.0784	2.5	0.35		1320	130	662	34	487	12	470	12		63.1061
	Z_NA-19-02_2-42		584.4	51.3	111	6.138		10.48	2.8	0.0871	6.8	1.145	7.4	0.0954	2.8	0.37		1360	130	775	40	588	15	568	16		56.7647
	Z_NA-19-02_2-43		2357.5	336.3	602.1	4.664		4.83	2.5	0.0908	3.4	2.59	4.2	0.2072	2.5	0.60		1442	64	1299	31	1214	28	1200	28		15.8114
	Z_NA-19-02_2-44		917.4	203.6	329.1	2.842		5.2	2	0.0929	4.9	2.46	5.3	0.1922	2	0.37		1486	94	1261	38	1133	20	1113	21		23.755
	Z_NA-19-02_2-45		4634.1	128.6	140.9	29.201		12.43	2.8	0.0789	7.3	0.874	7.8	0.0804	2.8	0.35		1170	150	638	37	499	13	486	13		57.3504
	Z_NA-19-02_2-46		104	5.3	22.9	5.836		12.5	3.5	0.0582	9.2	0.642	9.8	0.08	3.5	0.35		540	200	504	39	496	17	495	17		8.14815
	Z_NA-19-02_2-47		799.7	118.6	496.4	1.937		11.49	2	0.0611	5	0.733	5.4	0.087	2	0.38		640	110	558	23	538	10	536	11		15.9375
	Z_NA-19-02_2-48		58.7	33.5	45	1.316		3.522	2.2	0.1048	6.1	4.1	6.5	0.284	2.2	0.35		1710	110	1654	53	1611	32	1602	33		5.78947
	Z_NA-19-02_2-49		1034.2	118.7	542.6	2.097		12.73	1.6	0.0602	4.2	0.652	4.5	0.0785	1.6	0.36		611	90	510	18	487.5	7.6	485.5	7.8		20.2128
	Z_NA-19-02_2-50		555.5	67.6	130.2	6.284		12.68	2.3	0.1184	7.5	1.29	7.9	0.0788	2.3	0.29		1930	140	840	45	489	11	453	11		74.6632
	Z_NA-19-02_2-51		373.4	52.5	91.6	4.113		5.87	1.9	0.0818	4.4	1.923	4.8	0.1705	1.9	0.40		1241	86	1089	32	1015	18	1005	18		18.2111
	Z_NA-19-02_2-52		1324.8	153.6	445.4	4.427		13.45	2.5	0.0942	8.4	0.965	8.8	0.0743	2.5	0.29		1510	160	686	44	462	11	441	12		69.404
	Z_NA-19-02_2-53		932.6	263.2	977.9	1.05		12.4	2.9	0.0928	5.7	1.032	6.5	0.0807	2.9	0.45		1480	110	720	33	500	14	479	14		66.2162
	Z_NA-19-02_2-54		442.3	56.5	30.8	13.47		8.62	5.1	0.136	10	2.18	11	0.116	5.1	0.45		2180	180	1174	79	707	34	646	33		67.5688
	Z_NA-19-02_2-55		1363.9	417.6	956.5	1.561		10.37	2.3	0.1024	5.1	1.36	5.6	0.0964	2.3	0.41		1667	95	872	33	593	13	563	13		64.4271
	Z_NA-19-02_2-56		819.8	51.5	112	7.981		9.1	3.8	0.075	5	1.136	6.2	0.1098	3.8	0.61		1068	100	770	34	672	24	661	24		37.0787
	Z_NA-19-02_2-57		1014	77.4	152.8	6.722		3.68	3.1	0.109	3.6	4.08	4.8	0.2718	3.1	0.65		1783	66	1651	39	1550	43	1527	43		13.0679
	Z_NA-19-02_2-58		1504.7	20.4	55.8	27.805		6.91	2.9	0.073	4.1	1.456	5	0.1448	2.9	0.58		1012	83	912	30	872	24	867	24		13.834
	Z_NA-19-02_2-59		1661	396.7	1719.2	4.976		12.93	2.7	0.0641	4.3	0.683	5.1	0.0773	2.7	0.53		743	92	528	21	480	13	476	13		35.397
	Z_NA-19-02_2-60		181.1	97.4	125.8	1.367		4.246	1.9	0.0991	4.4	3.22	4.8	0.2355	1.9	0.39		1607	83	1461	37	1363	23	1345	24		15.1836
	Z_NA-19-02_2-61		234.9	46.4	204.9	1.155		7.97	5	0.0817	5.1	1.41	7.1	0.1255	5	0.70		1237	100	894	42	762	36	747	36		38.3994
	Z_NA-19-02_2-62		1139	41.9	169.9	11.33		12.55	3.7	0.0631	7.1	0.693	8.1	0.0797	3.7	0.46		710	150	534	33	494	18	490	18		30.4225
	Z_NA-19-02_2-63		741	146.4	584.1	1.273		13.09	1.5	0.0616	4.6	0.649	4.9	0.0764	1.5	0.31		660	99	508	19	474.7	7	471.8	7.1		28.0758
	Z_NA-19-02_2-64		650.2	117.4	129.8	5.099		3.14	4.5	0.2719	3.4	11.92	5.6	0.318	4.5	0.80				2598	53	1780	70	1443	60
	Z_NA-19-02_2-65		1264.6	43.4	97.8	12.725		6.94	5	0.0705	3.6	1.4	6.1	0.144	5	0.81		943	73	889	36	867	41	865	41		8.05938
	Z_NA-19-02_2-67		380.2	39.5	118.8	8.899		12.23	3.1	0.0694	9.6	0.782	10	0.0818	3.1	0.31		910	200	587	45	507	15	499	15		44.2857
	Z_NA-19-02_2-68		1387.9	324.6	1135.2	1.303		13.16	1.6	0.0674	4.5	0.706	4.8	0.076	1.6	0.33		849	93	542	20	472.2	7.2	466	7.3		44.3816
	Z_NA-19-02_2-69		164.5	2.5	6.3	27.141		13.03	2.4	0.0645	6.8	0.682	7.2	0.0767	2.4	0.34		760	140	528	30	477	11	472	11		37.2368
	Z_NA-19-02_2-70		596.4	97.8	375.2	3.097		12.87	1.8	0.0678	5.3	0.726	5.6	0.0777	1.8	0.32		860	110	554	24	482.3	8.4	475.9	8.6		43.9186
	Z_NA-19-02_2-71		682.1	237	889.7	0.824		12.71	2.7	0.0764	9.2	0.828	9.6	0.0787	2.7	0.28		1100	190	613	44	488	13	477	13		55.6364
	Z_NA-19-02_2-72		1140	67.1	64.1	17.726		9.07	4.3	0.0723	6.3	1.097	7.6	0.1102	4.3	0.56		990	130	752	40	674	27	666	27		31.9192
	Z_NA-19-02_2-73		889.9	45.8	132	10.881		12.68	4.2	0.0672	8.4	0.731	9.3	0.0788	4.2	0.45		840	170	557	40	489	20	483	20		41.7857
	Z_NA-19-02_2-74		1252.8	60.9	333.7	4.417		12.64	2.4	0.0708	5.3	0.772	5.8	0.0791	2.4	0.41		950	110	581	26	491	11	483	11		48.3158
	Z_NA-19-02_2-75		361.5	48.7	157.1	2.525		12.74	2	0.0833	9.1	0.901	9.3	0.0785	2	0.21		1270	180	652	45	487.1	9.2	471.6	9.9		61.6457
	Z_NA-19-02_2-76		877.3	113.8	222.1	3.91		12.22	2.5	0.0974	6.7	1.098	7.2	0.0818	2.5	0.35		1570	130	752	38	507	12	483	12		67.707
	Z_NA-19-02_2-77		1151.2	32.6	25.7	54.138		12.19	2.7	0.0651	4.7	0.736	5.4	0.082	2.7	0.49		777	100	560	23	508	13	504	13		34.6203
	Z_NA-19-02_2-78		1019.7	393.6	1325.8	0.912		11.93	2.5	0.079	13	0.91	13	0.0838	2.5	0.19		1170	260	659	65	519	13	505	14		55.641
	Z_NA-19-02_2-79		1204.5	138.9	584	2.018		13.37	1.9	0.0591	3.9	0.61	4.3	0.0748	1.9	0.43		571	85	483	17	465.1	8.4	463.5	8.5		18.5464
	Z_NA-19-02_2-80		1715.7	61.5	136.8	14.301		11.8	3.8	0.0672	3.8	0.785	5.3	0.0847	3.8	0.71		844	78	588	24	524	19	518	19		37.9147
	Z_NA-19-02_2-81		626.9	168.6	537.5	1.127		9.88	1.7	0.0635	4.9	0.886	5.2	0.1012	1.7	0.32		730	100	644	25	621.4	10	619	10		14.8767
	Z_NA-19-02_2-82		304.8	40.3	122.7	2.36		9	2.6	0.0617	5	0.945	5.6	0.1111	2.6	0.46		660	110	675	28	679	17	679	17		-2.87879
	Z_NA-19-02_2-83		517.8	134.3	438.3	1.457		11.33	3.4	0.0715	5.9	0.869	6.8	0.0882	3.4	0.50		970	120	635	32	545	18	537	18		43.8144
	Z_NA-19-02_2-84		250.2	18.8	80.1	3.078		13.08	1.8	0.059	5.9	0.622	6.1	0.0765	1.8	0.29		570	130	491	24	475	8.3	473.7	8.5		16.6667
	Z_NA-19-02_2-85		833.9	103.6	132.8	6.522		8.35	3.2	0.0845	4.5	1.395	5.5	0.1198	3.2	0.58		1304	87	887	33	729	22	711	22		44.0951
	Z_NA-19-02_2-86		1146.5	538.1	847.5	1.951		4.56	3.1	0.0894	3.5	2.7	4.7	0.2195	3.1	0.66		1412	68	1330	35	1279	36	1271	36		9.41926
	Z_NA-19-02_2-87		103.6	44.4	36.8	2.952		3.45	4.6	0.1346	5.3	5.37	7.1	0.289	4.6	0.66		2159	93	1880	60	1639	67	1576	66		24.0852
	Z_NA-19-02_2-88		1222.3	159.5	621	2.911		11.97	2.8	0.06	4.2	0.691	5.1	0.0835	2.8	0.55		602	91	533	21	517	14	516	14		14.1196
	Z_NA-19-02_2-89		2090.6	495.6	2118	1.165		12.89	2.4	0.0826	5.1	0.884	5.6	0.0776	2.4	0.42		1260	100	643	27	482	11	467	11		61.746
	Z_NA-19-02_2-90		782.1	74.6	317.6	2.638		12.79	2.9	0.06	4.7	0.646	5.5	0.0782	2.9	0.52		600	100	506	22	485	13	483	14		19.1667
	Z_NA-19-02_2-91		321	45.5	77	4.234		5.46	1.9	0.0811	4.5	2.05	4.9	0.1833	1.9	0.39		1223	89	1132	34	1085	19	1078	19		11.2837
	Z_NA-19-02_2-92		504.1	56	213.4	2.76		12.98	2	0.0738	6	0.784	6.3	0.077	2	0.32		1040	120	588	28	478.4	9.2	468.5	9.3		54
	Z_NA-19-02_2-93		1754.5	95.2	189.4	8.805		11.28	6.1	0.0971	6.4	1.19	8.8	0.0887	6.1	0.69		1570	120	794	49	548	32	522	31		65.0955
	Z_NA-19-02_2-94		1712.2	184	510.7	4.632		10.2	3.4	0.0973	7.5	1.31	8.3	0.098	3.4	0.41		1570	140	852	48	603	20	576	19		61.5924
	Z_NA-19-02_2-95		597.1	16.7	35.3	21.428		11.44	5.3	0.0663	7.9	0.799	9.5	0.0874	5.3	0.56		810	170	596	43	540	27	535	27		33.3333
	Z_NA-19-02_2-96		1011.9	308.6	190.8	6.113		11.12	2.6	0.111	10	1.38	10	0.09	2.6	0.25		1820	180	880	61	555	14	520	15		69.5055
	Z_NA-19-02_2-97		1011.5	37.9	84.5	14.191		7.74	2.9	0.0769	3.9	1.37	4.9	0.1292	2.9	0.59		1119	78	876	29	784	21	773	21		29.9374
	Z_NA-19-02_2-98		987.3	145.3	629.3	1.606		13.32	2.2	0.0675	4.6	0.698	5.1	0.0751	2.2	0.43		853	95	538	21	466.7	9.8	460.4	9.8		45.2872
	Z_NA-19-02_2-99		1119	147.6	570.7	3.697		11.43	5.7	0.0752	5.2	0.907	7.7	0.0875	5.7	0.73		1070	110	656	37	541	29	530	29		49.4393
	Z_NA-19-02_2-100		594.1	70.4	122.7	5.113		9.83	2.7	0.0744	4.6	1.043	5.4	0.1017	2.7	0.50		1051	94	725	28	624	16	614	16		40.628
	Z_NA-19-02_2-101		880	53.3	78.5	22.733		10.89	4.6	0.0675	6.8	0.855	8.2	0.0919	4.6	0.56		850	140	627	38	567	25	561	25		33.2941
	Z_NA-19-02_2-102		327.5	36.2	89.8	3.482		11.61	2.1	0.0769	6.8	0.913	7.2	0.0861	2.1	0.30		1120	140	659	35	532	11	520	11		52.5
	Z_NA-19-02_2-103		285.4	31.5	112.2	2.486		11.98	1.9	0.0703	6.9	0.809	7.1	0.0835	1.9	0.26		940	140	602	32	516.9	9.2	509	9.5		45.0106
	Z_NA-19-02_2-104		381.2	62.8	197.1	2.021		12.09	2.2	0.0846	5.9	0.965	6.3	0.0827	2.2	0.35		1310	120	686	32	512	11	496	11		60.916
	Z_NA-19-02_2-105		758.6	208.3	987.9	0.77		14.1	2	0.072	5.1	0.704	5.5	0.0709	2	0.37		990	100	541	23	441.6	8.7	432.9	8.8		55.3939
	Z_NA-19-02_2-107		233.5	24.2	98.4	2.431		12.79	2.2	0.0657	9.8	0.708	10	0.0782	2.2	0.22		800	210	544	42	485	10	480	11		39.375
	Z_NA-19-02_2-108		872.3	154.5	206.1	4.313		6.48	5.7	0.1075	4.8	2.29	7.4	0.1544	5.7	0.77		1756	87	1208	53	926	49	885	48		47.2665
	Z_NA-19-02_2-109		687.4	81.9	338.3	2.016		12.35	2.7	0.0729	5.7	0.814	6.3	0.081	2.7	0.43		1010	120	605	29	502	13	493	13		50.297
	Z_NA-19-02_2-110		199	24.5	80.7	2.449		11.75	2.4	0.0682	8.3	0.8	8.7	0.0851	2.4	0.28		870	170	597	39	527	12	520	13		39.4253
	Z_NA-19-02_2-111		1160	107.1	291.1	3.82		8.85	3.2	0.0889	6.6	1.38	7.3	0.113	3.2	0.44		1400	130	882	43	690	21	668	21		50.7143
	Z_NA-19-02_2-112		507.1	232.3	355.2	1.381		4.276	2	0.0873	3.8	2.81	4.3	0.2339	2	0.46		1366	74	1359	32	1355	24	1354	25		0.805271
	Z_NA-19-02_2-113		715.7	141.4	636.1	1.107		11.99	4.4	0.0605	5.3	0.695	6.9	0.0834	4.4	0.64		620	110	536	29	516	22	515	22		16.7742
	Z_NA-19-02_2-114		371.6	15.1	43.1	8.548		13.14	2.2	0.0736	7.1	0.772	7.4	0.0761	2.2	0.29		1030	140	581	33	472.7	9.9	463	10		54.1068
	Z_NA-19-02_2-115		1061.4	278.6	776.4	3.058		10.9	3.1	0.1065	5.6	1.346	6.4	0.0917	3.1	0.48		1740	100	866	37	566	17	533	16		67.4713
	Z_NA-19-02_2-116		396.2	60.4	125.3	3.121		5.74	1.7	0.0749	4.3	1.798	4.6	0.1741	1.7	0.38		1066	86	1045	30	1035	17	1034	17		2.90807
	Z_NA-19-02_2-117		942.6	71.3	279.6	4.44		12.28	2.3	0.0653	5.1	0.733	5.5	0.0814	2.3	0.41		780	110	559	24	505	11	500	11		35.2564
	Z_NA-19-02_2-118		1283.1	123.9	534	2.592		12.83	1.7	0.0698	4.3	0.749	4.6	0.0779	1.7	0.37		921	88	568	20	483.8	8	476.2	8		47.4701
	Z_NA-19-02_2-119		3614.5	125.3	166	21.14		11.99	1.8	0.0712	4.6	0.819	5	0.0834	1.8	0.37		964	94	607	23	516.3	9.1	507.9	9.2		46.4419
	Z_NA-19-02_2-120		6497.8	1206.8	2101.4	3.503		6.03	3.6	0.0866	3.9	1.98	5.3	0.1657	3.6	0.69		1352	75	1108	36	989	33	972	33		26.8491
a - 207Pb-corrected 206Pb/238U date (Stacey and Kramers, 1975)
b - Discordance = [1 - 206Pb/238U date/207Pb/206Pb date] × 100)

## Sheet: Standard Data
1st analytical session standard data
Analysis	Approx_U_ppm	Approx_Pb_ppm	Approx_Th_ppm	U_Th	U238_Pb206	U238_Pb206_2SE%	Pb207_Pb206	Pb207_Pb206_2SE%	Pb207_U235	Pb207_U235_2SE%	Pb206_U238	Pb206_U238_2SE%	rho	PbPb_date	PbPb_date_2SE	UPb7_date	UPb7_date_2SE	UPb6_date	UPb6_date_2SE	cor7UPb6_date	cor7UPb6_date_2SE	68/76_%_disc	68/75_%_disc
Z_Fish-1	320.3	2.4	132	2.278	211	6.6	0.051	47	0.033	48	0.00473	6.6	0.14	200	1300	33	15	30.4	2	30.3	2.2	84.8	7.88
Z_Fish-2	294.9	1.5	110.2	2.546	218	6.6	0.057	64	0.036	64	0.00459	6.6	0.10	500	2010	36	23	29.5	1.9	29.1	2.3	94.1	18.06
Z_Fish-3	314.1	2	126.6	2.47	223	6.7	0.074	31	0.046	32	0.00449	6.7	0.21	1000	700	45	14	28.9	1.9	27.9	2	97.11	35.78
Z_Fish-4	222.6	1.6	99.3	2.251	224	8.8	0.074	51	0.046	52	0.00446	8.8	0.17	1000	1000	45	23	28.7	2.5	27.7	2.8	97.13	36.22
Z_Fish-5	184.3	1.3	73.8	2.418	227	7.9	0.007	460	0.004	460	0.0044	7.9	0.02	-111000	48500	4	19	28.3	2.2	29.7	2.6	100.03	-607.5
Z_Fish-6	232.4	1.7	102.2	2.212	235	11	0.061	61	0.036	62	0.00425	11	0.17	630	1780	36	22	27.4	2.9	26.9	3.1	95.65	23.89
Z_Fish-7	323.5	1.7	162.3	1.991	219	6	0.056	34	0.035	35	0.00456	6	0.17	400	800	35	12	29.3	1.8	29	1.9	92.67	16.29
Z_Fish-8	243.5	2.3	151.1	1.645	198	11	0.036	74	0.025	74	0.00504	11	0.15	-600	5000	25	18	32.4	3.6	32.8	3.8	105.4	-29.6
Z_Fish-9	71.1	0.6	44	1.736	231	12	0.113	71	0.067	72	0.00433	12	0.17	1850	1760	66	46	27.8	3.4	25.5	4.2	98.5	57.88
SECONDARY																				28.9	2
																				MSWD = 1.53	n=9/9
Z_Plesovice-1	604.6	8.6	54.9	10.474	18.06	2.7	0.0552	6	0.422	6.6	0.0554	2.7	0.41	420	130	357	20	347.4	9.1	346.6	9.2	17.29	2.69
Z_Plesovice-2	592.6	8.9	54.6	10.521	18.45	2.6	0.0557	4.8	0.416	5.5	0.0542	2.6	0.47	440	110	353	16	340.3	8.6	339.3	8.7	22.66	3.6
Z_Plesovice-3	552.2	7.8	52.5	10.5	17.93	3.2	0.0508	6.9	0.39	7.6	0.0558	3.2	0.41	230	160	335	22	350	11	351	11	-52.17	-4.48
Z_Plesovice-4	613.3	8.3	54.2	10.808	18.48	3.1	0.0536	5.6	0.4	6.4	0.0541	3.1	0.49	350	130	341	19	340	10	340	10	2.86	0.29
Z_Plesovice-5	442.7	7.1	42.9	10.428	18.18	2.9	0.0537	6.7	0.407	7.3	0.055	2.9	0.40	360	150	347	21	345.2	9.9	345.1	10	4.11	0.52
Z_Plesovice-6	683.7	14.8	103.6	6.602	18.84	2.9	0.0525	6.4	0.384	7.1	0.0531	2.9	0.41	310	150	330	20	333.4	9.5	333.6	9.6	-7.55	-1.03
Z_Plesovice-7	605.7	11.2	116	5.247	18.61	2.8	0.0533	7.4	0.395	7.9	0.0537	2.8	0.35	340	170	338	23	337.4	9.1	337.3	9.2	0.76	0.18
Z_Plesovice-8	595.8	13.3	128.6	4.601	18.86	2.3	0.0534	7.2	0.39	7.5	0.053	2.3	0.31	350	160	335	21	333.1	7.5	332.9	7.7	4.83	0.57
Z_Plesovice-11	574.6	9.9	63.6	9.403	18.16	2.7	0.0542	7.1	0.411	7.6	0.0551	2.7	0.36	380	160	350	22	345.6	9.1	345.3	9.2	9.05	1.26
Z_Plesovice-12	554.5	8	50.1	10.662	18.55	2.8	0.0503	7.5	0.374	8	0.0539	2.8	0.35	210	170	322	22	338.5	9.1	339.7	9.3	-61.19	-5.12
Z_Plesovice-13	475.6	8.4	49	10.117	17.76	2.5	0.0509	7	0.395	7.5	0.0563	2.5	0.34	230	160	338	21	353	8.8	354.2	8.9	-53.48	-4.44
Z_Plesovice-14	577.5	9.7	119.4	4.74	18.53	2.8	0.0576	6.1	0.429	6.7	0.054	2.8	0.41	510	140	362	21	338.8	9.2	337	9.3	33.57	6.41
Z_Plesovice-15	527.2	8.7	60.7	8.633	18.32	2.3	0.0545	6.2	0.41	6.7	0.0546	2.3	0.35	390	140	349	20	342.6	7.8	342.1	7.9	12.15	1.83
Z_Plesovice-16	664.8	17.2	202.9	3.311	18.99	2.9	0.0604	8.3	0.438	8.8	0.0527	2.9	0.33	620	180	369	27	330.8	9.4	327.9	9.5	46.65	10.35
Z_Plesovice-17	1837.1	35.9	136.7	10.511	18.81	2.8	0.0574	8.5	0.42	9	0.0532	2.8	0.31	500	190	356	27	333.9	9.2	332.1	9.3	33.22	6.21
Z_Plesovice-18	1197.4	20.9	104.5	10.506	18.3	3.1	0.0556	7.6	0.419	8.2	0.0546	3.1	0.38			355	25	343	10	342	11		3.38
SECONDARY																				339	3
																				MSWD = 1.7	n=15/16
Z_91500-1	80	15	30	2.657	5.61	3	0.0756	8.6	1.85	9.1	0.1781	3	0.33	1080	170	1065	60	1057	29	1056	30	2.13	0.75
Z_91500-2	80.1	15	30	2.729	5.55	2.7	0.074	7.4	1.84	7.9	0.1801	2.7	0.34	1040	150	1058	52	1067	26	1069	27	-2.6	-0.85
Z_91500-3	80	15	30	2.625	5.6	3.3	0.0764	8.1	1.88	8.8	0.1786	3.3	0.38	1100	160	1074	58	1059	33	1057	33	3.73	1.4
Z_91500-4	80	15	30	2.608	5.57	2.8	0.0738	8.9	1.83	9.4	0.1796	2.8	0.30	1040	180	1055	61	1065	27	1066	28	-2.4	-0.95
Z_91500-5	80	15	30	2.706	5.64	4.7	0.0741	12	1.81	13	0.1772	4.7	0.38	1040	240	1049	82	1052	46	1052	47	-1.15	-0.29
Z_91500-6	80	15	30	2.658	5.53	3.9	0.0751	8.7	1.87	9.6	0.1809	3.9	0.41	1070	180	1071	63	1072	38	1072	39	-0.19	-0.09
Z_91500-7	80	15	30	2.694	5.6	2.8	0.0759	7.3	1.87	7.8	0.1785	2.8	0.35	1090	150	1070	52	1059	27	1057	28	2.84	1.03
Z_91500-8	80	15	30	2.68	5.56	3.1	0.0733	8.6	1.82	9.1	0.1798	3.1	0.34	1020	170	1052	60	1066	30	1068	31	-4.51	-1.33
Z_91500-9	80	15	30	2.684	5.61	3	0.0766	8	1.88	8.6	0.1783	3	0.35	1110	160	1075	57	1058	30	1055	30	4.68	1.58
Z_91500-10	80	15	30	2.599	5.55	2.6	0.0727	7.5	1.81	7.9	0.1802	2.6	0.33	1000	150	1047	52	1068	26	1071	26	-6.8	-2.01
Z_91500-11	80	15	30	2.735	5.69	4.2	0.0784	8.8	1.9	9.8	0.1758	4.2	0.43	1160	180	1081	65	1044	40	1039	41	10	3.42
Z_91500-12	80	15	30	2.591	5.51	4.2	0.0735	8.9	1.84	9.8	0.1813	4.2	0.43	1030	180	1059	64	1074	42	1076	42	-4.27	-1.42
Z_91500-13	80	15	30	2.805	5.6	2.9	0.0767	8.3	1.89	8.8	0.1787	2.9	0.33	1110	170	1077	59	1060	28	1057	29	4.5	1.58
Z_91500-14	80	15	30	2.597	5.57	2.9	0.0712	10	1.76	11	0.1796	2.9	0.27	960	210	1032	68	1065	28	1069	29	-10.94	-3.2
Z_91500-15	80	15	30	2.644	5.6	3.8	0.0767	8.7	1.89	9.5	0.1787	3.8	0.40	1110	180	1078	63	1060	37	1057	38	4.5	1.67
Z_91500-16	79.9	15	30	2.663	5.58	3.3	0.076	11	1.88	11	0.1791	3.3	0.30	1090	210	1073	74	1062	32	1061	34	2.57	1.03
Z_91500-17	80.2	15	29.8	2.649	5.55	3.6	0.0679	7.9	1.69	8.6	0.1801	3.6	0.41	860	160	1003	55	1067	35	1076	36	-24.07	-6.38
Z_91500-18	80.6	15.6	30.3	2.775	5.63	4.9	0.0803	6.2	1.96	7.9	0.1776	4.9	0.62	1200	100	1103	53	1054	48	1047	48	12.17	4.44
PRIMARY
2nd analytical session standard data
Analysis	Approx_U_ppm	Approx_Pb_ppm	Approx_Th_ppm	U_Th	U238_Pb206	U238_Pb206_2SE%	Pb207_Pb206	Pb207_Pb206_2SE%	Pb207_U235	Pb207_U235_2SE%	Pb206_U238	Pb206_U238_2SE%	rho	PbPb_date	PbPb_date_2SE	UPb7_date	UPb7_date_2SE	UPb6_date	UPb6_date_2SE	cor7UPb6_date	cor7UPb6_date_2SE
Z_91500-1	80.3	15	30.3	2.659	5.588	1.8	0.0755	5.3	1.86	5.6	0.179	1.8	0.32	1080	110	1068	37	1061	17	1060	18
Z_91500-2	79.3	14.8	29.6	2.676	5.554	1.7	0.0743	6.3	1.84	6.5	0.18	1.7	0.27	1050	130	1061	43	1067	17	1068	18
Z_91500-3	80.3	15.5	30	2.665	5.67	1.9	0.0739	6.7	1.8	7	0.1763	1.9	0.27	1040	140	1044	46	1047	19	1047	19
Z_91500-4	80.5	15	30.2	2.67	5.58	1.8	0.0749	5.8	1.85	6.1	0.1792	1.8	0.30	1070	120	1064	40	1063	18	1063	18
Z_91500-5	79.9	14.9	30.3	2.657	5.583	1.5	0.0753	6.1	1.86	6.3	0.1791	1.5	0.24	1080	120	1067	42	1062	15	1061	16
Z_91500-6	77.3	14.5	28.7	2.692	5.49	2	0.076	6.3	1.91	6.6	0.182	2	0.30	1100	130	1084	44	1078	20	1077	20
Z_91500-7	83.8	16.1	32.1	2.641	5.58	1.8	0.0733	6.7	1.81	6.9	0.1791	1.8	0.27	1020	140	1049	45	1062	18	1064	19
Z_91500-8	79.6	14.8	29.6	2.68	5.586	1.7	0.0736	6.2	1.82	6.4	0.179	1.7	0.27	1030	120	1051	42	1062	17	1063	18
Z_91500-9	80.8	14.8	30.2	2.666	5.6	1.8	0.0771	5.8	1.9	6	0.1787	1.8	0.30	1120	120	1081	40	1060	18	1057	19
Z_91500-10	77.9	15.1	29.4	2.665	5.547	1.7	0.0749	6.4	1.86	6.6	0.1803	1.7	0.26	1060	130	1067	44	1068	17	1069	18
Z_91500-11	78.8	14.9	29.7	2.674	5.51	1.8	0.073	6.6	1.82	6.9	0.1813	1.8	0.27	1010	140	1054	45	1074	18	1077	19
Z_91500-12	83.2	15	31.1	2.644	5.67	2.1	0.0766	7.1	1.86	7.4	0.1763	2.1	0.28	1110	140	1067	49	1047	20	1044	21
Z_91500-13	82.8	15.3	30.2	2.688	5.62	2.1	0.074	7.7	1.81	8	0.178	2.1	0.27	1040	160	1051	52	1056	21	1057	22
Z_91500-14	79	14.8	29.7	2.722	5.6	2.3	0.0754	7.5	1.86	7.9	0.1787	2.3	0.29	1080	150	1066	52	1060	23	1059	24
Z_91500-15	77.1	14.8	29.6	2.625	5.56	2.1	0.0747	7.2	1.85	7.5	0.1799	2.1	0.28	1060	150	1064	49	1067	21	1067	22	PRIMARY AGE STANDARD
Z_Plesovice-1	633.7	10	61.3	10.362	18.18	1.6	0.0576	5.1	0.437	5.4	0.05499	1.6	0.29	520	110	368	17	345.1	5.3	343.3	5.4
Z_Plesovice-2	576.2	9.2	55.6	10.36	18.44	1.4	0.0541	6	0.404	6.1	0.05423	1.4	0.22	370	130	345	18	340.5	4.5	340.1	4.7
Z_Plesovice-4	581.5	9.4	56.2	10.379	18.43	1.6	0.0536	5.8	0.401	6	0.05427	1.6	0.27	350	130	342	18	340.7	5.4	340.5	5.6
Z_Plesovice-5	547.6	9	54.4	10.077	18.34	1.7	0.0522	5.4	0.392	5.6	0.05453	1.7	0.29	290	120	336	16	342.3	5.5	342.7	5.6
Z_Plesovice-6	515.1	8.3	50.4	10.308	18.03	1.6	0.0503	5.1	0.385	5.3	0.05548	1.6	0.31	210	120	330	15	348.1	5.5	349.4	5.6
Z_Plesovice-7	638.4	9	61	10.58	18.61	1.9	0.0553	5.9	0.41	6.2	0.0537	1.9	0.30	430	130	349	18	337.4	6.1	336.6	6.3
Z_Plesovice-8	491.3	7.5	46.7	10.441	18.51	1.5	0.0554	6.2	0.412	6.4	0.05401	1.5	0.24	430	140	351	19	339.1	5.1	338.2	5.3
Z_Plesovice-9	590.6	9.3	56.7	10.343	18.55	1.6	0.0509	5.2	0.378	5.4	0.0539	1.6	0.30	230	120	326	15	338.4	5.4	339.4	5.5
Z_Plesovice-10	586.4	9.8	56.9	10.286	18.49	1.4	0.0521	5.3	0.388	5.5	0.05409	1.4	0.27	290	120	333	15	339.6	4.8	340.1	4.9
Z_Plesovice-11	626.4	9.8	59.1	10.438	18.43	1.9	0.0523	5.3	0.391	5.6	0.0543	1.9	0.34	300	120	335	16	340.6	6.4	341	6.5
Z_Plesovice-12	579.4	9.4	57.2	10.017	18.51	1.8	0.0531	6.1	0.395	6.3	0.05403	1.8	0.29	330	140	338	18	339.2	6	339.3	6.1
Z_Plesovice-13	646.4	10.3	64.1	9.743	18.6	1.6	0.0522	5.2	0.387	5.5	0.05377	1.6	0.30	290	120	332	16	337.6	5.4	338	5.5
Z_Plesovice-14	931.8	13.8	95.6	9.851	18.54	1.5	0.0542	5.6	0.403	5.9	0.05392	1.5	0.26	380	130	344	17	338.6	5.1	338.2	5.2
Z_Plesovice-15	832.1	12.4	83.7	10.06	18.43	2.6	0.0568	5.9	0.425	6.5	0.0543	2.6	0.41	480	130	360	20	340.7	8.8	339.2	8.9
																				340	2
																			MSWD	0.44	n = 13/14
